# Supplementary material for: Dynamics of Biofilm Regrowth in Drinking Water Distribution Systems
Source: Appl Environ Microbiol. 2016 Jun 30;82(14):4155–68. doi: 10.1128/AEM.00109-16 (PMC4959196; doi:10.1128/AEM.00109-16)
Supplement: Supplemental material [file AEM.00109-16_zam999117256so1.pdf]

**Figure S1:** Spearman rank correlations between physico-chemical and environmental variables from samples collected during flushing. Vales marked with an asterisk (\*) and highlighted are showing significant correlations.

|                      | Chao1  | Shannon | Turbidity | TOC     | Temp    | pH      | Cl      | Al     | Fe     | Mn     | Nitrate | Phosphate | Sulphate | Alphaproteobacteria | Betaproteobacteria | Gammaaproteobacteria | Deltaproteobacteria | Bacilli | Actinobacteria | Mollicutes | Flavobacteria | Bacteroidia | Cyanobacteria | Acidobacteria | Bacteroidete | Planctomycetes | Clostridia | Planctomycetia | Spirochaetia | Sphingobacteriia | Actinobacteria | Anaerolineae | Cytophagia | Holophagae | Spirochaetes | Chloroflexi | Firmicutes | Gemmatimonadetes |       |  |
|----------------------|--------|---------|-----------|---------|---------|---------|---------|--------|--------|--------|---------|-----------|----------|---------------------|--------------------|----------------------|---------------------|---------|----------------|------------|---------------|-------------|---------------|---------------|--------------|----------------|------------|----------------|--------------|------------------|----------------|--------------|------------|------------|--------------|-------------|------------|------------------|-------|--|
| Chao1                | 1.000  |         |           |         |         |         |         |        |        |        |         |           |          |                     |                    |                      |                     |         |                |            |               |             |               |               |              |                |            |                |              |                  |                |              |            |            |              |             |            |                  |       |  |
| Shannon              | .186   | 1.000   |           |         |         |         |         |        |        |        |         |           |          |                     |                    |                      |                     |         |                |            |               |             |               |               |              |                |            |                |              |                  |                |              |            |            |              |             |            |                  |       |  |
| Turbidity            | -.118  | .391    | 1.000     |         |         |         |         |        |        |        |         |           |          |                     |                    |                      |                     |         |                |            |               |             |               |               |              |                |            |                |              |                  |                |              |            |            |              |             |            |                  |       |  |
| TOC                  | -.034  | .336    | .479*     | 1.000   |         |         |         |        |        |        |         |           |          |                     |                    |                      |                     |         |                |            |               |             |               |               |              |                |            |                |              |                  |                |              |            |            |              |             |            |                  |       |  |
| Temp                 | -.003  | .273    | -.216     | .167    | 1.000   |         |         |        |        |        |         |           |          |                     |                    |                      |                     |         |                |            |               |             |               |               |              |                |            |                |              |                  |                |              |            |            |              |             |            |                  |       |  |
| pH                   | .140   | -.378   | -.373     | -.395   | -.719** | 1.000   |         |        |        |        |         |           |          |                     |                    |                      |                     |         |                |            |               |             |               |               |              |                |            |                |              |                  |                |              |            |            |              |             |            |                  |       |  |
| Cl                   | -.189  | -.208   | -.192     | -.286   | .310    | .108    | 1.000   |        |        |        |         |           |          |                     |                    |                      |                     |         |                |            |               |             |               |               |              |                |            |                |              |                  |                |              |            |            |              |             |            |                  |       |  |
| Al                   | -.181  | .418*   | .515*     | .786**  | .381    | -.778** | -.452*  | 1.000  |        |        |         |           |          |                     |                    |                      |                     |         |                |            |               |             |               |               |              |                |            |                |              |                  |                |              |            |            |              |             |            |                  |       |  |
| Fe                   | .320   | .586**  | .743**    | .714**  | .024    | -.443*  | -.524** | .690** | 1.000  |        |         |           |          |                     |                    |                      |                     |         |                |            |               |             |               |               |              |                |            |                |              |                  |                |              |            |            |              |             |            |                  |       |  |
| Mn                   | .152   | .541**  | .635**    | .524**  | .190    | -.707** | -.667** | .786** | .857** | 1.000  |         |           |          |                     |                    |                      |                     |         |                |            |               |             |               |               |              |                |            |                |              |                  |                |              |            |            |              |             |            |                  |       |  |
| Nitrate              | -.123  | -.139   | .491*     | .381    | -.786** | .287    | -.476*  | .214   | .333   | .167   | 1.000   |           |          |                     |                    |                      |                     |         |                |            |               |             |               |               |              |                |            |                |              |                  |                |              |            |            |              |             |            |                  |       |  |
| Phosphate            | .473*  | .444*   | .611**    | .667**  | -.119   | -.192   | -.429*  | .524** | .905** | .619** | .452*   | 1.000     |          |                     |                    |                      |                     |         |                |            |               |             |               |               |              |                |            |                |              |                  |                |              |            |            |              |             |            |                  |       |  |
| Sulphate             | -.147  | -.234   | .287      | -.167   | -.952** | .719**  | -.119   | -.381  | -.071  | -.286  | .738**  | .071      | 1.000    |                     |                    |                      |                     |         |                |            |               |             |               |               |              |                |            |                |              |                  |                |              |            |            |              |             |            |                  |       |  |
| Alphaproteobacteria  | .254   | -.115   | -.379     | -.095   | -.168   | .437*   | -.229   | -.334  | -.050  | -.129  | -.102   | -.037     | .060     | 1.000               |                    |                      |                     |         |                |            |               |             |               |               |              |                |            |                |              |                  |                |              |            |            |              |             |            |                  |       |  |
| Betaproteobacteria   | .209   | .387    | .423*     | -.084   | -.244   | -.104   | -.242   | .173   | .320   | .302   | .323    | .423*     | .265     | -.407*              | 1.000              |                      |                     |         |                |            |               |             |               |               |              |                |            |                |              |                  |                |              |            |            |              |             |            |                  |       |  |
| Gammaaproteobacteria | .235   | .664**  | .640**    | .389    | .218    | -.498*  | -.110   | .470*  | .704** | .620** | .011    | .609**    | -.187    | -.261               | .473*              | 1.000                |                     |         |                |            |               |             |               |               |              |                |            |                |              |                  |                |              |            |            |              |             |            |                  |       |  |
| Deltaproteobacteria  | .097   | .409*   | .163      | -.194   | -.081   | .032    | .100    | -.013  | 0.000  | -.050  | .053    | .102      | .202     | -.365               | .690**             | .197                 | 1.000               |         |                |            |               |             |               |               |              |                |            |                |              |                  |                |              |            |            |              |             |            |                  |       |  |
| Bacilli              | -.324  | .205    | .703**    | .439*   | -.205   | -.301   | -.355   | .533** | .565** | .544** | .499*   | .462*     | .236     | -.100               | .200               | .270                 | -.03                | 1.000   |                |            |               |             |               |               |              |                |            |                |              |                  |                |              |            |            |              |             |            |                  |       |  |
| Actinobacteria       | -.301  | -.451*  | -.141     | .179    | .152    | -.221   | .005    | .236   | -.194  | -.045  | .095    | -.218     | -.189    | -.329               | -.277              | -.217                | -.446*              | .132    | 1.000          |            |               |             |               |               |              |                |            |                |              |                  |                |              |            |            |              |             |            |                  |       |  |
| Mollicutes           | .034   | .277    | .519**    | .450*   | -.026   | -.229   | -.180   | .352   | .541** | .441*  | .203    | .421*     | .031     | .147                | .072               | .301                 | -.114               | .543**  | -.157          | 1.000      |               |             |               |               |              |                |            |                |              |                  |                |              |            |            |              |             |            |                  |       |  |
| Flavobacteriia       | -.154  | .446*   | .643**    | .281    | -.037   | -.368   | -.205   | .489*  | .542** | .497*  | .308    | .534**    | .108     | -.357               | .593**             | .520**               | .413*               | .534**  | -.278          | .094       | 1.000         |             |               |               |              |                |            |                |              |                  |                |              |            |            |              |             |            |                  |       |  |
| Bacteroidia          | -.048  | .478*   | .534**    | .100    | .229    | -.443*  | .060    | .313   | .423*  | .423*  | -.121   | .315      | -.126    | -.450*              | .347               | .594**               | .253                | .308    | -.190          | .004       | .576**        | 1.000       |               |               |              |                |            |                |              |                  |                |              |            |            |              |             |            |                  |       |  |
| Cyanobacteria        | .077   | .084    | .484*     | .462*   | -.478*  | .233    | -.252   | .102   | .483*  | .218   | .549**  | .475*     | .452*    | .320                | -.156              | .157                 | -.087               | .472*   | -.160          | .375       | .097          | -.070       | 1.000         |               |              |                |            |                |              |                  |                |              |            |            |              |             |            |                  |       |  |
| Acidobacteria        | .501*  | .573**  | .061      | .072    | .049    | -.085   | -.330   | .145   | .390   | .331   | -.013   | .464*     | -.125    | -.047               | .476*              | .291                 | .384                | .067    | -.370          | .178       | .293          | .407*       | -.109         | 1.000         |              |                |            |                |              |                  |                |              |            |            |              |             |            |                  |       |  |
| Bacteroidete         | .326   | .404    | .120      | .103    | -.214   | .011    | -.422*  | .182   | .264   | .254   | .314    | .336      | .139     | -.202               | .604**             | .089                 | .562**              | .026    | -.260          | .099       | .177          | .027        | -.031         | .524**        | 1.000        |                |            |                |              |                  |                |              |            |            |              |             |            |                  |       |  |
| Planctomycetes       | .151   | .399    | .173      | .198    | -.008   | -.089   | -.113   | .208   | .266   | .169   | .166    | .361      | .008     | -.353               | .443*              | .134                 | .286                | .087    | -.175          | .191       | .364          | .059        | -.148         | .385          | .582**       | 1.000          |            |                |              |                  |                |              |            |            |              |             |            |                  |       |  |
| Clostridia           | -.259  | .307    | -.122     | -.439*  | .213    | .025    | .418*   | -.260  | -.328  | -.273  | -.455*  | -.370     | -.045    | -.127               | .085               | .018                 | .538**              | -.100   | -.337          | -.327      | .087          | .276        | -.158         | .027          | -.058        | -.105          | 1.000      |                |              |                  |                |              |            |            |              |             |            |                  |       |  |
| Planctomycetia       | .465*  | .443*   | .119      | .074    | -.184   | .188    | -.081   | -.050  | .265   | .042   | .176    | .444*     | .171     | -.180               | .468*              | .230                 | .437*               | .097    | -.200          | .138       | .088          | .037        | .162          | .547**        | .527**       | .590**         | .185       | 1.000          |              |                  |                |              |            |            |              |             |            |                  |       |  |
| Spirochaetia         | .090   | .551**  | -.075     | -.246   | .384    | -.186   | .187    | .035   | -.027  | .005   | -.451*  | -.005     | -.250    | -.245               | .445*              | .272                 | .668**              | -.180   | -.402          | -.223      | .405*         | .446*       | -.486*        | .445*         | .251         | .313           | .583**     | .190           | 1.000        |                  |                |              |            |            |              |             |            |                  |       |  |
| Sphingobacteriia     | .395   | .367    | .045      | .079    | -.263   | .087    | -.481*  | .147   | .255   | .223   | .352    | .384      | .166     | -.030               | .643**             | .285                 | .450*               | .040    | -.132          | -.033      | .309          | -.089       | -.007         | .423*         | .661**       | .480*          | -.190      | .523**         | .226         | 1.000            |                |              |            |            |              |             |            |                  |       |  |
| Actinobacteria       | -.080  | .411*   | .057      | .186    | .268    | -.264   | -.268   | .351   | .236   | .333   | -.185   | .066      | -.227    | -.124               | -.124              | .093                 | .034                | .159    | .036           | .006       | .017          | .171        | .022          | .219          | -.061        | .078           | .357       | .264           | .209         | -.112            | 1.000          |              |            |            |              |             |            |                  |       |  |
| Anaerolineae         | .550** | .258    | -.445*    | -.209   | .011    | .289    | -.249   | -.180  | -.026  | -.092  | -.178   | .146      | -.069    | .173                | .263               | -.082                | .419*               | -.365   | -.301          | -.371      | -.065         | -.002       | -.197         | .628**        | .427*        | .125           | .265       | .489*          | .443*        | .421*            | .321           | 1.000        |            |            |              |             |            |                  |       |  |
| Cytophagia           | .286   | .074    | -.173     | -.356   | -.124   | .169    | -.079   | -.172  | -.164  | -.124  | -.008   | -.040     | .132     | -.372               | .428*              | -.081                | .562**              | -.272   | -.010          | -.354      | .020          | .170        | -.229         | .401          | .375         | .232           | .199       | .416*          | .401         | .390             | .163           | .537**       | 1.000      |            |              |             |            |                  |       |  |
| Holophagae           | .410*  | .120    | -.389     | -.598** | .082    | .153    | .059    | -.390  | -.285  | -.191  | -.390   | -.194     | -.106    | -.100               | .443*              | -.011                | .434*               | -.585** | -.209          | -.532**    | -.034         | .175        | -.581**       | .354          | .370         | .127           | .275       | .165           | .574**       | .345             | -.122          | .611**       | .612**     | 1.000      |              |             |            |                  |       |  |
| Spirochaetes         | -.005  | .182    | .219      | -.117   | .062    | -.066   | .218    | .055   | .045   | -.031  | -.055   | .117      | .107     | -.294               | .424*              | .331                 | .659**              | .093    | -.110          | -.251      | .360          | .351        | .073          | -.060         | .023         | -.095          | .540**     | .205           | .480*        | .203             | .089           | .176         | .462*      | .271       | 1.000        |             |            |                  |       |  |
| Chloroflexi          | .180   | .109    | -.406*    | -.192   | -.110   | .291    | -.169   | -.107  | -.245  | -.245  | .054    | -.067     | .107     | -.195               | .326               | -.197                | .496*               | -.339   | .072           | -.590**    | -.012         | -.112       | -.270         | .299          | .454*        | .303           | .235       | .416*          | .443*        | .528**           | .267           | .730**       | .664**     | .559**     | .289         | 1.000       |            |                  |       |  |
| Firmicutes           | -.025  | .480*   | .085      | .017    | .583**  | -.559** | .177    | .348   | .077   | .221   | -.417*  | -.017     | -.478*   | -.448*              | .217               | .299                 | .472*               | .129    | .080           | -.135      | .264          | .515*       | -.288         | .273          | .120         | .157           | .470*      | .215           | .623**       | .156             | .368           | .155         | .387       | .221       | .547**       | .270        | 1.000      |                  |       |  |
| Gemmatimonadetes     | -.207  | -.366   | -.420*    | -.181   | .060    | .204    | .218    | -.315  | -.507* | -.384  | -.264   | -.649**   | -.061    | .398                | -.682**            | -.499*               | -.265               | -.388   | .053           | -.035      | -.625**       | -.439*      | .069          | -.450*        | -.356        | -.516**        | -.038      | -.540**        | -.320        | -.370            | -.099          | -.227        | -.158      | -.176      | -.254        | -.194       | -.157      | 1.000            |       |  |
| Verrucomicrobia      | .193   | .155    | -.166     | -.301   | .263    | -.151   | .157    | -.053  | -.146  | -.061  | -.303   | -.069     | -.231    | -.330               | .246               | -.010                | .510*               | -.080   | -.116          | -.079      | .047          | .189        | -.234         | .370          | .234         | .264           | .396       | .430*          | .441*        | .145             | .163           | .355         | .642**     | .263       | .373         | .325        | .571**     | -.147            | 1.000 |  |
